# Supplementary material for: A highly transparent and autonomic self-healing organogel from solvent regulation based on hydrazide derivatives
Source: Royal Society of Chemistry journal article supplement (doi:10.1039/c8ta04366c), 2018-01-01
Supplement: c8ta04366c1.pdf [file c8ta04366c1.pdf]

## Supplementary Information

### A highly transparent and autonomic self-healing organogel from solvent regulation based on hydrazone derivatives

Liu He, Xia Ran<sup>\*</sup>, Jinxing Li, Qionqiong Gao, Yanmin Kuang, and Lijun Guo<sup>\*</sup>

*Institute of Micro/Nano Photonic Materials and Application, School of Physics and Electronics, Henan University, Kaifeng 475004, China.*

**Table S1.** Gelation abilities <sup>a, b</sup> of BNB-*tn* (*n*=1, 2, 4 and 8) and BNBC-t4 in single organic solvents.

| Solvents           | BNB-t1 | BNB-t2 | BNB-t4 | BNB-t8 | BNBC-t4 |
|--------------------|--------|--------|--------|--------|---------|
| DMSO               | S      | S      | S      | S      | S       |
| Methanol           | S      | S      | S      | S      | P       |
| DMF                | S      | S      | S      | S      | S       |
| Acetic acid        | S      | S      | S      | S      | S       |
| Acetone            | S      | S      | S      | S      | S       |
| Ethanol            | S      | S      | S      | S      | S       |
| THF                | S      | S      | S      | S      | S       |
| <i>n</i> -propanol | S      | S      | S      | S      | S       |
| TCM                | PS     | PS     | G      | G      | S       |
| Dichloromethane    | P      | P      | G      | G      | S       |
| Anisole            | I      | P      | G      | G      | S       |
| Benzene            | I      | PS     | G      | G      | S       |
| Chlorobenzene      | I      | PS     | G      | G      | S       |
| Xylene             | I      | PS     | G      | G      | S       |
| Toluene            | I      | PS     | G      | G      | S       |
| CYH                | I      | I      | I      | G      | I       |
| Hexane             | I      | I      | I      | PS     | I       |

<sup>a</sup> G: stable gel formed at room temperature, concentration: 4 mg/mL; S: soluble; PS: partly soluble; I: insoluble; P: precipitate.

<sup>b</sup> DMSO: dimethyl sulphoxide; DMF: dimethyl formamide; THF: tetrahydrofuran; TCM: chloroform; CYH: cyclohexane.

<sup>\*</sup>To whom correspondence should be addressed. E-mail: ranxia@henu.edu.cn, juneguo@henu.edu.cn

**Table S2** Gelation abilities <sup>a</sup> of BNB-t4 in TCM/CYH (V:V) mixtures.

| TCM/CYH | State | CGC |
|---------|-------|-----|
| 100:0   | G     | 2.2 |
| 90:10   | G     | 1.1 |
| 80:20   | G     | 0.8 |
| 70:30   | G     | 0.7 |
| 60:40   | G     | 0.7 |
| 50:50   | G     | 0.6 |
| 40:60   | G     | 2.5 |
| 30:70   | G     | 3.2 |
| 20:80   | Sus   | -   |
| 10:90   | Sus   | -   |
| 0:100   | I     | -   |

<sup>a</sup> G: stable gel formed at room temperature; Sus: suspension; I: insoluble; CGC: critical gelation concentration (mg/mL), the minimum concentration necessary for gelation of solvents.

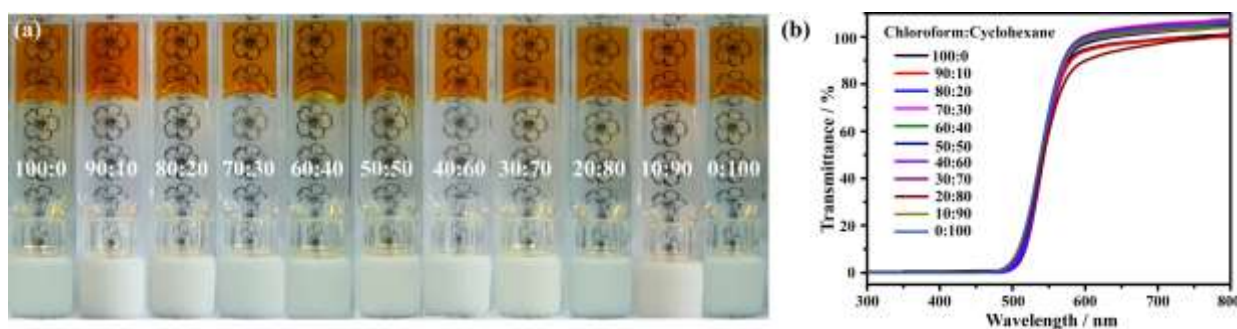

**Fig. S1** (a) Photographs of 4 mg/mL BNB-t8 gel in various ratios of TCM/CYH at room temperature. (b) Transmittance spectra of BNB-t8 gel (4 mg/mL) in various ratios of TCM/CYH.

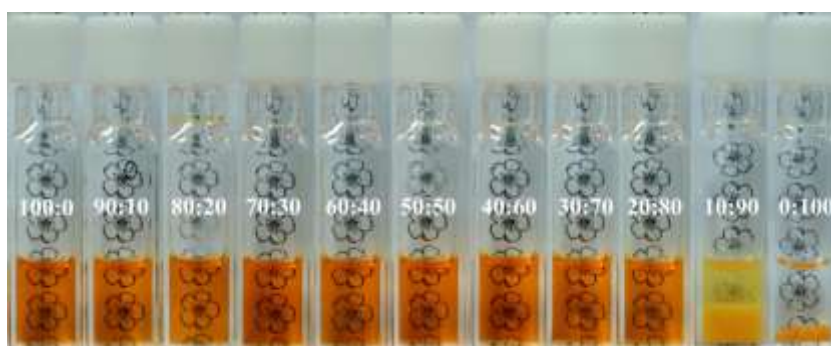

**Fig. S2** Photographs of 4 mg/mL BNBC-t4 in various ratios of TCM/CYH at room temperature.

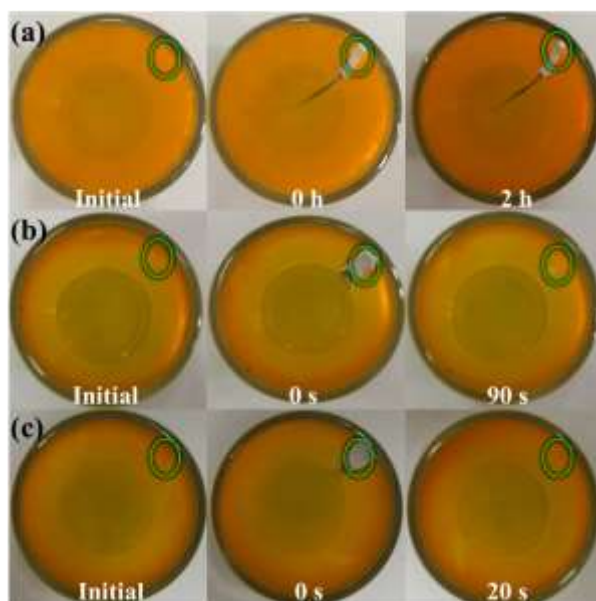

**Fig. S3** Photographs of 16 mg/mL BNB-t4 gels (a) in TCM (b) 60:40 TCM/CYH and (c) 40:60 TCM/CYH upon mechanical damages after free standing.

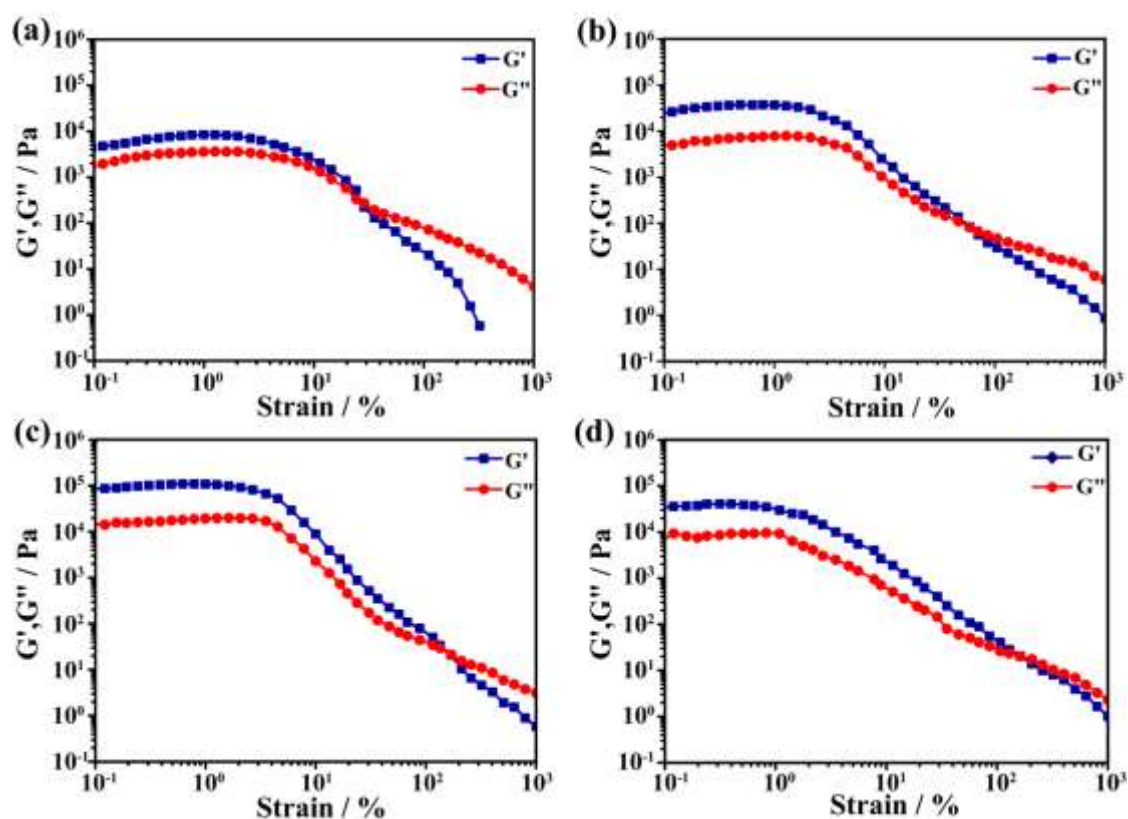

**Fig. S4** Log-Log strain sweep with the frequency = 1.0 Hz of 16 mg/mL BNB-t4 gels in (a)100:0, (b)70:30, (c)50:50 and (d)30:70 TCM/CYH mixtures at 25 °C.

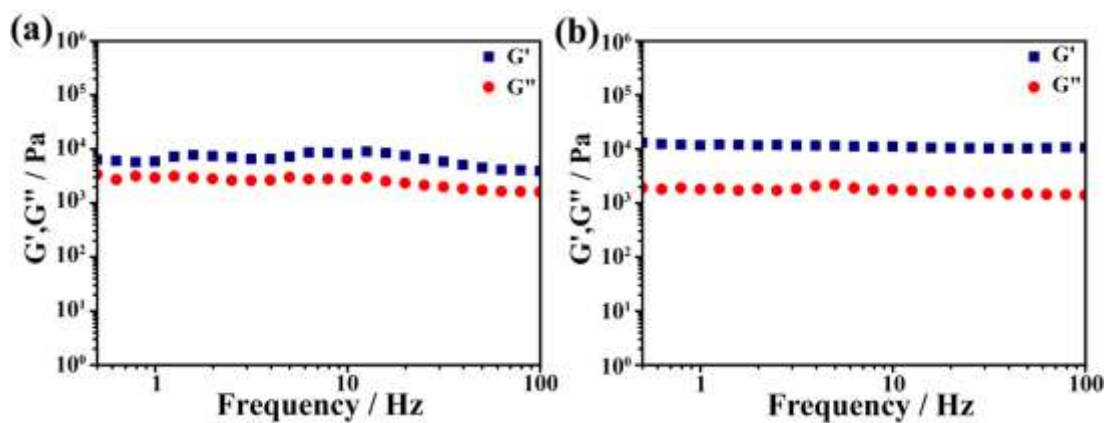

**Fig. S5** Log-Log frequency sweep with the strain = 1.0 % of 16 mg/mL BNB-t4 gels in (a) 100:0 and (b) 70:30 TCM/CYH mixtures at 25 °C.

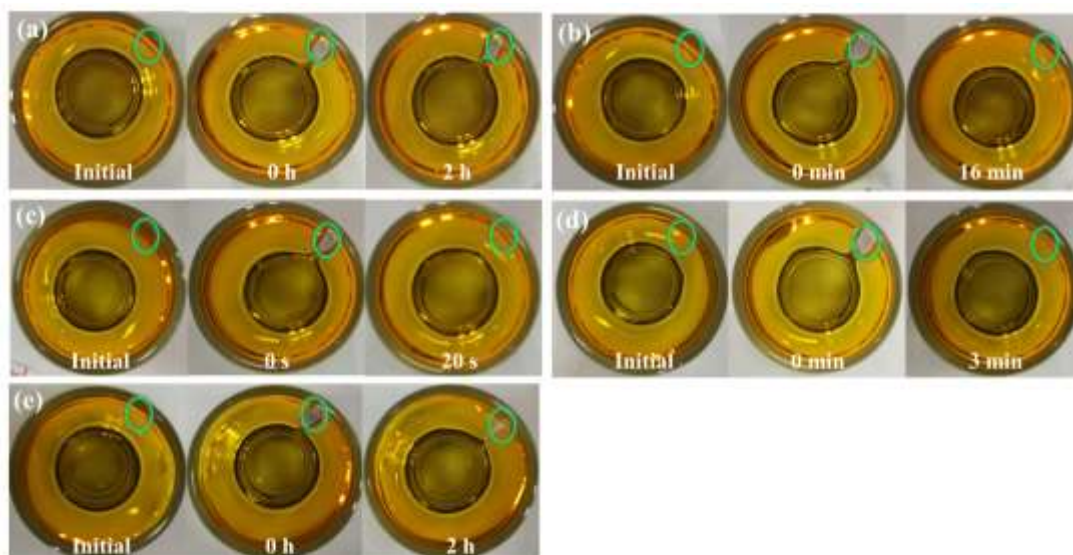

**Fig. S6** Self-healing diagrams of 16 mg/mL BNB-t8 gels in (a) 100:0, (b) 70:30, (c) 50:50, (d) 30:70, (e) 0:100 TCM/CYH mixtures.

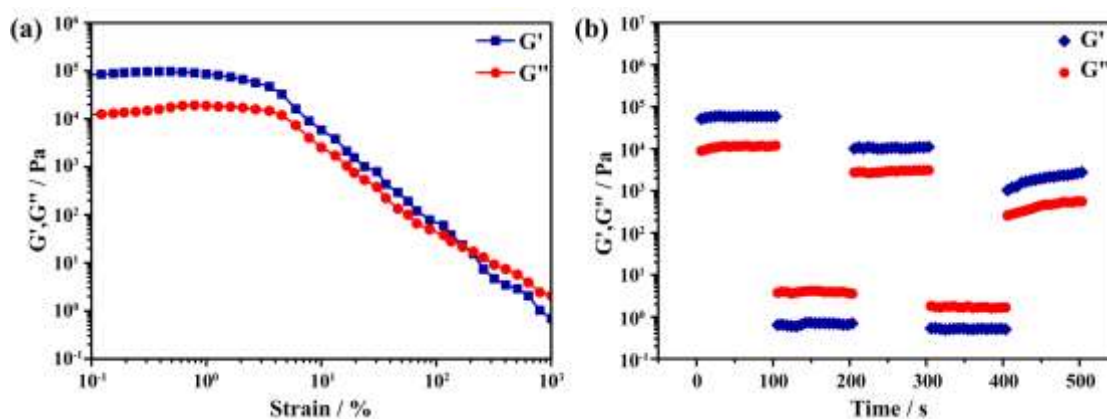

**Fig. S7** (a) Log-Log strain sweep with the frequency = 1.0 Hz of 16 mg/mL BNB-t8 gels in 50:50 TCM/CYH mixtures at 25 °C. (b) Continuous-step measurements of 16 mg/mL BNB-t8 gels in 50:50 TCM/CYH mixtures with alternating the strain amplitudes between 1% and 1000% (frequency = 1.0 Hz).

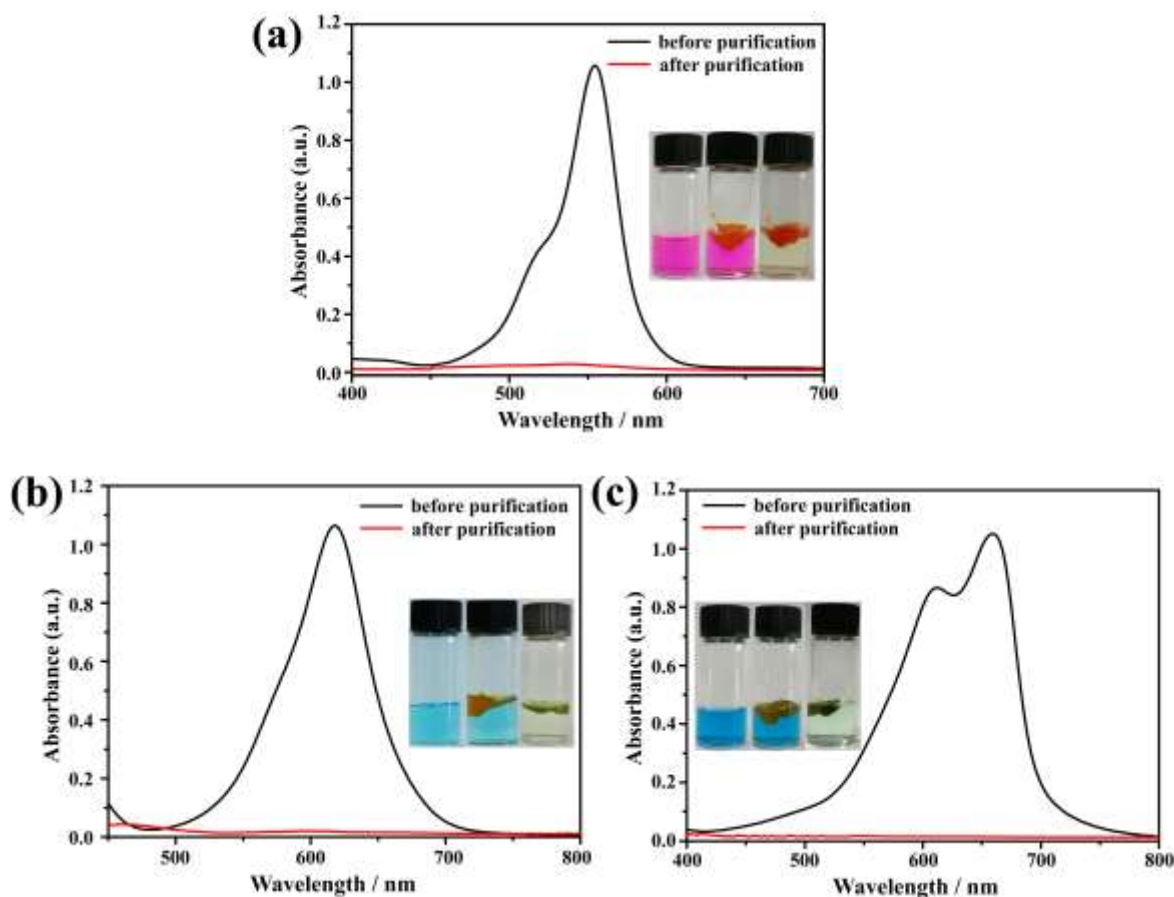

**Fig. S8** Absorption spectra of water contaminated with (a) rhodamine B, (b) malachite green, (c) methylene blue dyes before (black) and after elimination (red). Insets: Photographs of removed dye molecules from aqueous solution by BNB-t4 organogel in 50:50 TCM/CYH mixtures.

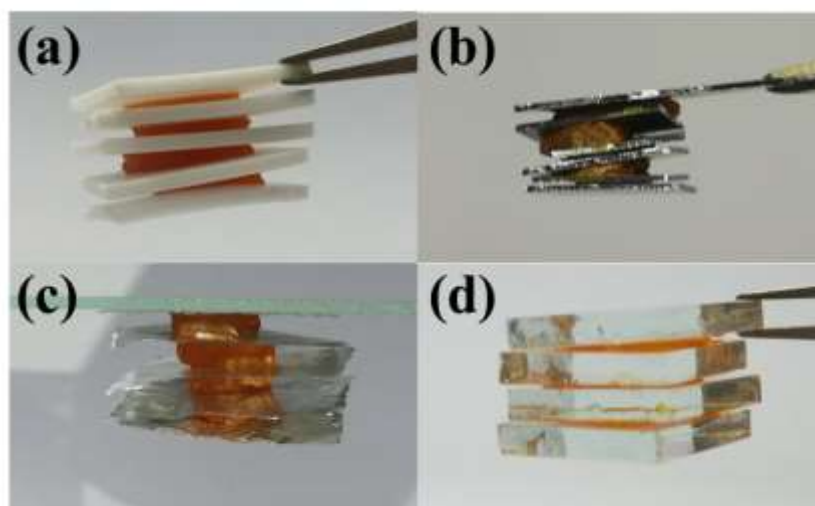

**Fig. S9** Photographs of adhesion abilities in lifting up different adherends with BNB-t4 gels (50 mg/mL): (a) polyethylene foam, (b) silicon chip, (c) silver paper and (d) conductive glass.

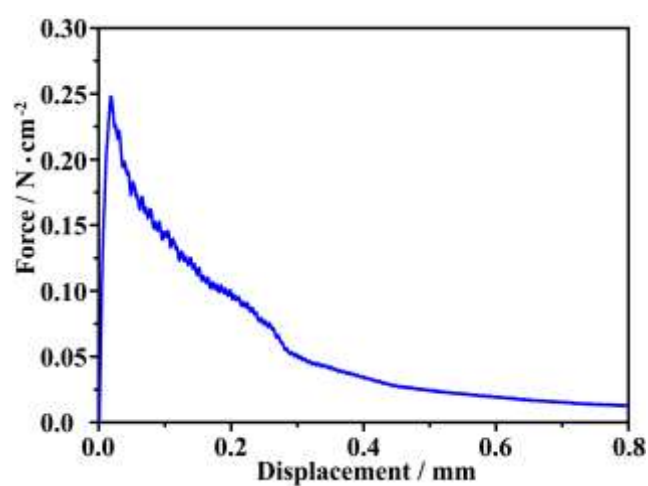

**Fig. S10** Peeling strength of 16 mg/mL BNB-t4 gel in 50:50 TCM/CYH mixtures on stainless steel substrate.



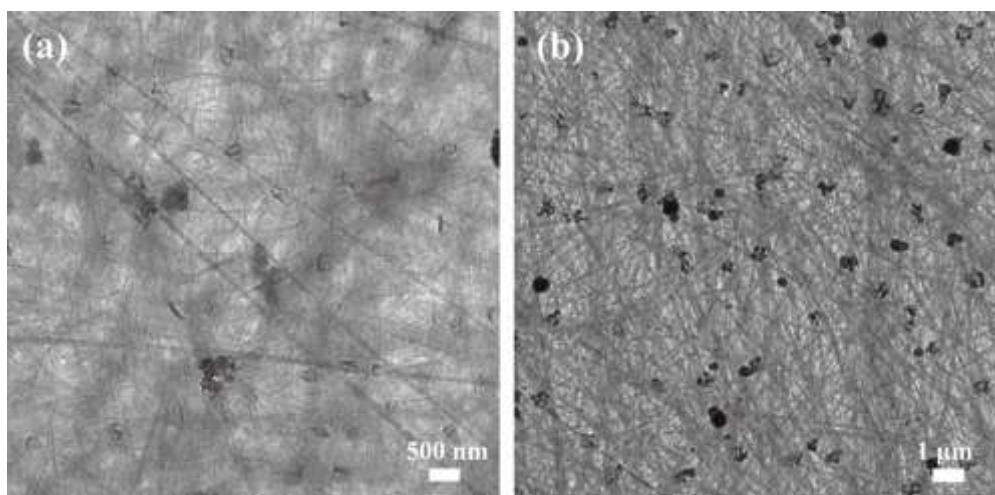

**Fig. S11** TEM images of BNB-t4 suspension (2 mg/mL) in TCM/CYH mixtures: (a) 20:80 and (b) 10:90.

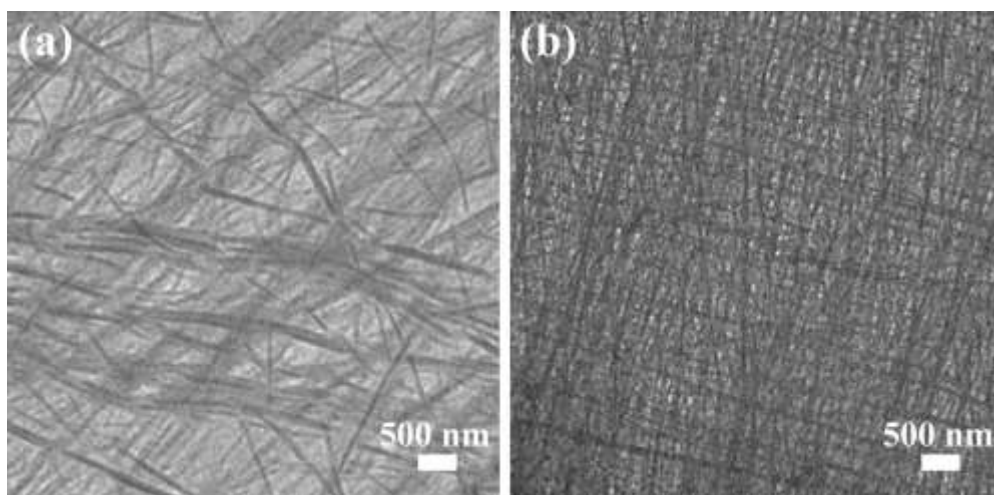

**Fig. S12** TEM images of BNB-t4 gels from 30:70 TCM/CYH mixtures (4 mg/mL) at different temperatures: (a) 20 °C and (b) 70 °C.

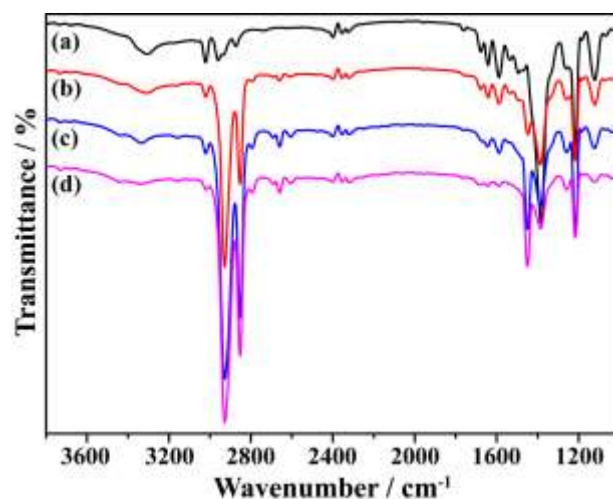

**Fig. S13** FT-IR spectra of BNB-t4 gels in: (a) TCM, (b) 70:30 TCM/CYH, (c) 50:50 TCM/CYH and (d) 30:70 TCM/CYH mixtures.

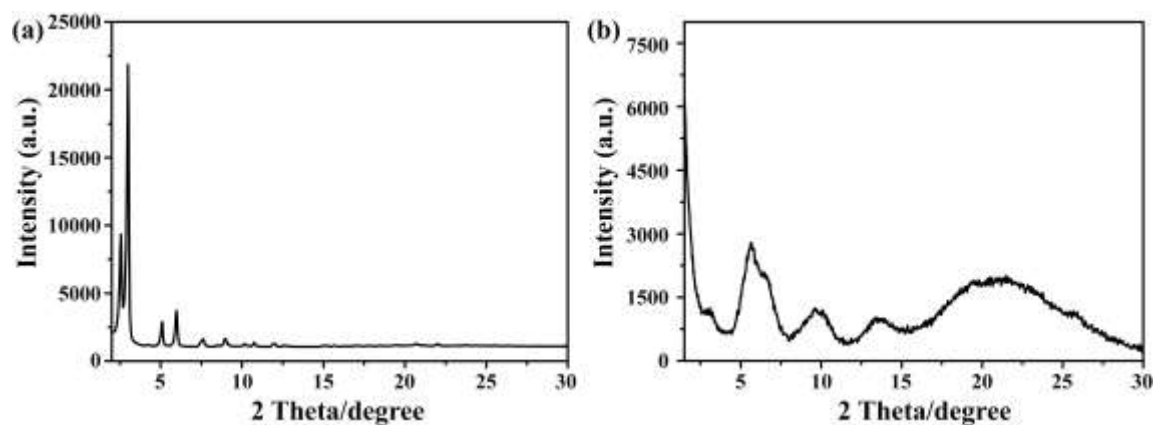

**Fig. S14** XRD patterns of (a) BNB-t4 powder and (b) BNB-t4 xerogel from 50:50 TCM/CYH mixtures.



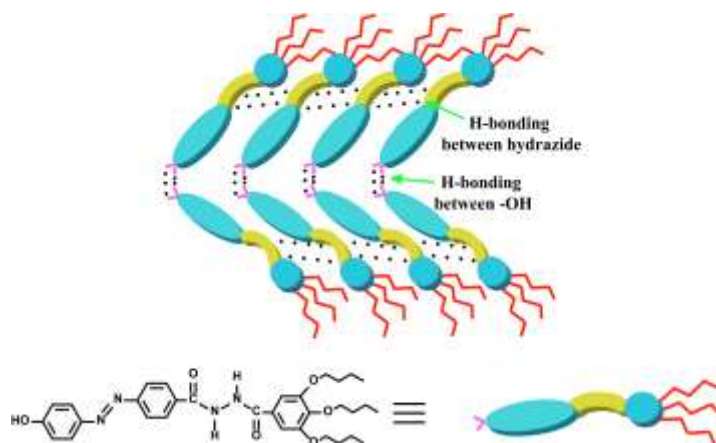

**Fig. S15** A possible packing motif of BNB-t4 molecules in TCM/CYH mixtures.

### Calculations of the solubility parameters of gelator BNB-t4

In this method, the basic equation to obtain the value of each property from molecular structure is:

$$f(x) = \sum_i N_i C_i + W \sum_j M_j D_j$$

where  $C_i$  is the contribution of the first-order group of type  $i$  that appears  $N_i$  times in the compound, and  $D_j$  is the contribution of the second-order group of type  $j$  that appears  $M_j$  times in the compound.  $f(x)$  is the single equation of the property  $x$ , which is selected after a thorough study of the physicochemical and thermodynamic behaviors of property. The constant  $W$  is equal to 1 and 0 for compounds with and without second-order groups, respectively. The statistical values of the first-order and second-order approximations for Hansen solubility parameters can be found in “Int. J. Thermophys. 2008, 29, 568-585”.

By applying the group-contribution method for the estimation of Hansen solubility parameters, the equations can be written as:

$$\delta_d = \left( \sum_i N_i C_i + W \sum_j M_j D_j + 17.3231 \right) \text{MPa}^{1/2}$$

$$\delta_p = \left( \sum_i N_i C_i + W \sum_j M_j D_j + 7.3548 \right) \text{MPa}^{1/2}$$

$$\delta_h = \left( \sum_i N_i C_i + W \sum_j M_j D_j + 7.9793 \right) \text{MPa}^{1/2}$$

where  $\delta_d$  is the dispersion Hansen solubility parameter,  $\delta_p$  is the polar Hansen solubility parameter,  $\delta_h$  is the hydrogen-bonding Hansen solubility parameter. It should be mentioned that the equation of  $\delta_p$  and  $\delta_h$  are valid only for Hansen solubility parameter values greater than 3 MPa<sup>1/2</sup>.

**Table S3** First-order group approximation ( $W=0$ ) for the prediction of dispersion partial solubility parameter,  $\delta_d$ ; the polar partial solubility parameter,  $\delta_p$ ; and the hydrogen bonding partial solubility parameter,  $\delta_h$ , for the repeat unit of BNB-t4.

| first order group  | Occurrences, $N_i$ | Contributions, $C_i(\delta_d)$ | $N_i C_i$ ( $\delta_d$ ) | Contributions, $C_i(\delta_p)$ | $N_i C_i$ ( $\delta_p$ ) | Contributions, $C_i(\delta_h)$ | $N_i C_i$ ( $\delta_h$ ) |
|--------------------|--------------------|--------------------------------|--------------------------|--------------------------------|--------------------------|--------------------------------|--------------------------|
| -CH <sub>3</sub>   | 3                  | -0.9714                        | -2.9142                  | -1.6448                        | -4.9344                  | -0.7813                        | -2.3439                  |
| CH <sub>2</sub> <  | 6                  | -0.0269                        | -0.1614                  | -0.3045                        | -1.827                   | -0.4119                        | -2.4714                  |
| ACH                | 10                 | 0.1105                         | 1.105                    | -0.5303                        | -5.303                   | -0.4305                        | -4.305                   |
| AC                 | 7                  | 0.8446                         | 5.9122                   | 0.6187                         | 4.3309                   | 0.0084                         | 0.0588                   |
| ACOH               | 1                  | 0.5288                         | 0.5288                   | 1.101                          | 1.101                    | 6.958                          | 6.958                    |
| CH <sub>2</sub> O- | 3                  | 0.031                          | 0.093                    | 0.8826                         | 2.6478                   | -0.1528                        | -0.4584                  |
| NH                 | 2                  | *                              | *                        | 0.0103                         | 0.0206                   | 2.2086                         | 4.4172                   |
| >CO                | 2                  | -0.4343                        | -0.8686                  | 0.7905                         | 1.581                    | 1.8147                         | 3.6294                   |
| N(except as above) | 2                  | 1.5438                         | 3.0876                   | 2.578                          | 5.156                    | 1.1189                         | 2.2378                   |
| Constant,C         |                    |                                | 17.3231                  |                                | 7.3548                   |                                | 7.9793                   |
| $\sum N_i C_i + C$ |                    |                                | <b>24.1055</b>           |                                | <b>10.1277</b>           |                                | <b>15.7018</b>           |

**Table S4** Second-order group approximation ( $W=1$ ) for the prediction of dispersion partial solubility parameter,  $\delta_d$ ; the polar partial solubility parameter,  $\delta_p$ ; and the hydrogen bonding partial solubility parameter,  $\delta_h$ , for the repeat unit of BNB-t4.

| Second order group | Occurrences, $M_j$ | Contributions, $D_j(\delta_d)$ | $M_j D_j$ ( $\delta_d$ ) | Contributions, $D_j(\delta_p)$ | $M_j D_j$ ( $\delta_p$ ) | Contributions, $D_j(\delta_h)$ | $M_j D_j$ ( $\delta_h$ ) |
|--------------------|--------------------|--------------------------------|--------------------------|--------------------------------|--------------------------|--------------------------------|--------------------------|
| AC-O-C             | 3                  | 0.2568                         | 0.7704                   | 0.8153                         | 2.4459                   | 0.6092                         | 1.8276                   |
| W                  |                    |                                | 1                        |                                | 1                        |                                | 1                        |
| $W \sum M_j D_j$   |                    |                                | 0.7704                   |                                | 2.4459                   |                                | 1.8276                   |

With the first-order and second-order group approximations (Table S3 and S4), the Hansen parameters of BNB-t4 gelator were calculated to be:

$$\delta_d = (\sum N_i C_i + C) + W \sum M_j D_j = 24.1055 + 0.7704 = 24.8759 \text{ MPa}^{1/2}$$

$$\delta_p = (\sum N_i C_i + C) + W \sum M_j D_j = 10.1277 + 2.4459 = 12.5736 \text{ MPa}^{1/2}$$

$$\delta_h = (\sum N_i C_i + C) + W \sum M_j D_j = 15.7018 + 1.8276 = 17.5294 \text{ MPa}^{1/2}$$

The Teas parameter of BNB-t4 can be calculated according to the group contribution method as follow:

$$f_d = \delta_d / (\delta_d + \delta_p + \delta_h) = 24.8759 / (24.8759 + 12.5736 + 17.5294) = 0.452$$

$$f_p = \delta_p / (\delta_d + \delta_p + \delta_h) = 12.5736 / (24.8759 + 12.5736 + 17.5294) = 0.229$$

$$f_h = \delta_h / (\delta_d + \delta_p + \delta_h) = 17.5294 / (24.8759 + 12.5736 + 17.5294) = 0.319$$

**Table S5** The Hansen parameters of different single organic solvents, and states <sup>a, b</sup> of BNB-t4 in various solvents.

| Solvents           | $\delta_d/\text{MPa}^{1/2}$ | $\delta_p/\text{MPa}^{1/2}$ | $\delta_h/\text{MPa}^{1/2}$ | State |
|--------------------|-----------------------------|-----------------------------|-----------------------------|-------|
| DMSO               | 18.4                        | 16.4                        | 10.2                        | S     |
| Methanol           | 15.1                        | 12.3                        | 22.3                        | S     |
| DMF                | 17.4                        | 13.7                        | 11.3                        | S     |
| Acetic acid        | 14.5                        | 8.0                         | 13.5                        | S     |
| Acetone            | 15.5                        | 10.4                        | 7.0                         | S     |
| Ethanol            | 15.8                        | 8.8                         | 19.4                        | S     |
| THF                | 16.8                        | 5.7                         | 8.0                         | S     |
| <i>n</i> -propanol | 16.0                        | 6.8                         | 17.4                        | S     |
| TCM                | 17.8                        | 3.1                         | 5.7                         | G     |
| Anisole            | 17.8                        | 4.1                         | 6.7                         | G     |
| Dichloromethane    | 18.2                        | 6.3                         | 6.1                         | G     |
| Benzene            | 18.4                        | 0.0                         | 2.0                         | G     |
| Chlorobenzene      | 19.0                        | 4.3                         | 2.0                         | G     |
| Xylene             | 17.6                        | 1.0                         | 3.1                         | G     |
| Toluene            | 18.0                        | 1.4                         | 2.0                         | G     |
| CYH                | 16.8                        | 0.0                         | 0.2                         | I     |
| Hexane             | 14.9                        | 0.0                         | 0.0                         | I     |

These data were taken from C. M. Hansen, *Hansen solubility parameters: a user's handbook*, CRC Press, Raton, 2007.

<sup>a</sup> S: soluble; G: stable gel formed at room temperature, concentration: 4 mg/mL; I: insoluble.

<sup>b</sup> DMSO: Dimethyl sulphoxide; DMF: Dimethyl formamide; THF: Tetrahydrofuran; TCM: Chloroform; CYH: Cyclohexane.

**Table S6** The Hansen parameters ( $\text{MPa}^{1/2}$ ) of binary solvents and the states <sup>a</sup> of BNB-t4 in mixed solvents.

| TCM/CYH<br>(V:V) | $\delta_d$ | $\delta_p$ | $\delta_h$ | State |
|------------------|------------|------------|------------|-------|
| 100:0            | 17.80      | 3.10       | 5.70       | G     |
| 90:10            | 17.70      | 2.79       | 5.15       | G     |
| 80:20            | 17.60      | 2.48       | 4.60       | G     |
| 70:30            | 17.50      | 2.17       | 4.05       | G     |
| 60:40            | 17.40      | 1.86       | 3.50       | G     |
| 50:50            | 17.30      | 1.55       | 2.95       | G     |
| 40:60            | 17.20      | 1.24       | 2.40       | G     |
| 30:70            | 17.10      | 0.93       | 1.85       | G     |
| 20:80            | 17.00      | 0.62       | 1.30       | Sus   |
| 10:90            | 16.90      | 0.31       | 0.75       | Sus   |
| 0:100            | 16.80      | 0.00       | 0.20       | I     |

The Hansen parameters ( $\text{MPa}^{1/2}$ ) of binary organic solvents calculated according to  $\delta = \sum \phi_i \delta_i$ , (Equ. 68 of Chemical Reviews, 1975, 75, 731-753.)

<sup>a</sup> G: stable gel formed at room temperature, concentration: 4 mg/mL; Sus: suspension; I: insoluble.

**Table S7** The Teas parameters of different single organic solvents <sup>a</sup>.

| Solvents           | $f_d$ | $f_p$ | $f_h$ |
|--------------------|-------|-------|-------|
| DMSO               | 0.41  | 0.36  | 0.23  |
| THF                | 0.55  | 0.19  | 0.26  |
| DMF                | 0.41  | 0.32  | 0.27  |
| Acetone            | 0.47  | 0.32  | 0.21  |
| Ethanol            | 0.36  | 0.20  | 0.44  |
| Methanol           | 0.30  | 0.25  | 0.45  |
| <i>n</i> -propanol | 0.40  | 0.17  | 0.43  |
| Acetic acid        | 0.40  | 0.22  | 0.38  |
| Benzene            | 0.90  | 0.00  | 0.10  |
| Toluene            | 0.84  | 0.07  | 0.09  |
| Chlorobenzene      | 0.75  | 0.17  | 0.08  |
| TCM                | 0.67  | 0.12  | 0.21  |
| Xylene             | 0.81  | 0.05  | 0.14  |
| Dichloromethane    | 0.60  | 0.21  | 0.19  |
| Anisole            | 0.62  | 0.14  | 0.24  |
| CYH                | 0.98  | 0.00  | 0.012 |
| Hexane             | 1     | 0.00  | 0.00  |

<sup>a</sup> DMSO: Dimethyl sulphoxide; THF: Tetrahydrofuran; DMF: Dimethyl formamide; TCM: Chloroform; CYH: Cyclohexane.

**Table S8** The Teas parameters of binary organic solvents.

| TCM/CYH<br>(V/V) | $f_d$ | $f_p$ | $f_h$ |
|------------------|-------|-------|-------|
| 100 : 0          | 0.67  | 0.12  | 0.21  |
| 90 : 10          | 0.69  | 0.11  | 0.20  |
| 80 : 20          | 0.71  | 0.10  | 0.19  |
| 70 : 30          | 0.74  | 0.09  | 0.17  |
| 60 : 40          | 0.76  | 0.08  | 0.15  |
| 50 : 50          | 0.79  | 0.07  | 0.14  |
| 40 : 60          | 0.83  | 0.06  | 0.11  |
| 30 : 70          | 0.86  | 0.05  | 0.09  |
| 20 : 80          | 0.90  | 0.03  | 0.07  |
| 10 : 90          | 0.94  | 0.02  | 0.04  |
| 0 : 100          | 0.99  | 0.00  | 0.01  |

The Teas parameters were calculated according to the following equations:

$$f_d = \delta_d / (\delta_d + \delta_p + \delta_h) \quad f_p = \delta_p / (\delta_d + \delta_p + \delta_h) \quad f_h = \delta_h / (\delta_d + \delta_p + \delta_h)$$



## Chemical reagent:

All chemicals were commercial and used without further purification. Ethanol (Tianjin Fuyu Fine Chemical Co., Ltd., AR,  $\geq 99.7\%$ ), methanol (Tianjin Fuyu Fine Chemical Co., Ltd., AR,  $\geq 99.5\%$ ), tetrahydrofuran (Tianjin Kemiou Chemical Reagent Co., Ltd, AR,  $\geq 99.0\%$ ), thionyl chloride (Shanghai Aladdin Bio-chem. Technology Co., Ltd, AR, 99.0%), dimethyl sulphoxide (Tianjin Fuyu Fine Chemical Reagent Co., Ltd, AR,  $\geq 99.0\%$ ), dimethyl formamide (Shanghai Aladdin Bio-chem. Technology Co., Ltd, AR,  $\geq 99.9\%$ ), acetic acid (Shanghai Aladdin Bio-chem. Technology Co., Ltd, AR,  $\geq 99.7\%$ ), acetone (Sinopharm Chemical Reagent Co., Ltd, AR,  $\geq 99.0\%$ ), *n*-propanol (Tianjin Kemiou Chemical Reagent Co., Ltd, AR,  $\geq 99.5\%$ ), chloroform (Sinopharm Chemical Reagent Co., Ltd, AR,  $\geq 99.0\%$ ), dichloromethane (Tianjin Fuyu Fine Chemical Co., Ltd., AR,  $\geq 99.5\%$ ), anisole (Sinopharm Chemical Reagent Co., Ltd, CP,  $\geq 98.0\%$ ), benzene (Shanghai Aladdin Bio-chem. Technology Co., Ltd, AR,  $\geq 99.5\%$ ), chlorobenzene (Tianjin Kemiou Chemical Reagent Co., Ltd, AR,  $\geq 99.0\%$ ), *p*-xylene (Shanghai Aladdin Bio-chem. Technology Co., Ltd, 98%), toluene (Tianjin Fuyu Fine Chemical Co., Ltd, AR,  $\geq 99.0\%$ ), cyclohexane (Tianjin Fuyu Fine Chemical Co., Ltd., AR,  $\geq 99.5\%$ ), *n*-hexane (Tianjin Fuyu Fine Chemical Co., Ltd., AR,  $\geq 98.0\%$ ).

## Synthesis

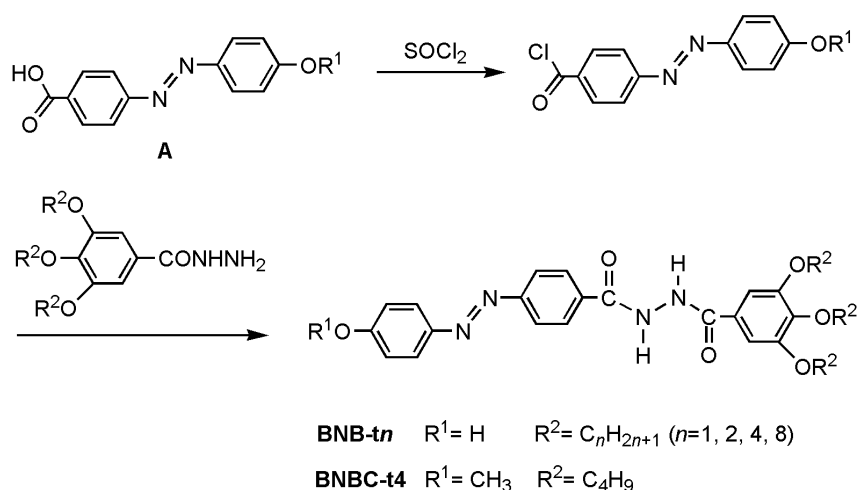

**Scheme S1.** Synthetic routes for BNB-*tn* ( $n=1, 2, 4, 8$ ) and BNBC-t4.

The compounds, N-(3,4,5-trialkoxyphenyl)-N'-4-[(4-hydroxyphenyl)azophenyl]benzohydrazide (BNB-*tn*) and N-(3,4,5-tributoxyphenyl)-N'-4-[(4-methoxyphenyl)azophenyl]benzohydrazide (BNBC-t4), were synthesized through the routes in Scheme S1. The synthetic details of BNB-t4 and BNB-t8 were reported in our previous papers [1, 2], and the synthetic

routes for BNB-t1, BNB-t2 and BNBC-t4 were similar to that of BNB-t8.

*Synthesis of N-(3,4,5-trialkoxyphenyl)-N'-4-[(4-hydroxyphenyl)azophenyl] benzohydrazide (BNB-t1 and BNB-t2)*

4-(4'-hydroxyphenyl)azobenzoic acid (A, 1.46 g, 0.006 mol) [3] and thionyl chloride (50 mL) were refluxed for 10 h. 4-(4'-hydroxyphenyl)azobenzoic acid chloride was collected after removing unreacted thionyl chloride. 4-(4'-hydroxyphenyl)azobenzoic acid chloride was dissolved in tetrahydrofuran, 3,4,5-trialkoxy-benzoyl hydrazine [4] was added slowly, and the resulting mixture was stirred for 8 h. The resulted reaction mixture was poured into an excess of ice water, and the precipitate was recrystallized from methanol and ethanol.

*N-(3,4,5-trimethoxyphenyl)-N'-4-[(4-hydroxyphenyl)azophenyl] benzohydrazide (BNB-t1)*

<sup>1</sup>H NMR (400MHz, DMSO-*d*<sub>6</sub>), (ppm, from TMS): 10.64 (s, 1H), 10.50 (s, 1H), 10.43(s, 1H), 8.15-8.07 (d, 2H, *J*=8.4 Hz), 7.97-7.89 (d, 2H, *J*=8.4 Hz), 7.89-7.81 (d, 2H, *J*=8.8 Hz), 7.28 (s, 2H), 7.02-6.93 (d, 2H, *J*=9.2 Hz), 3.86 (s, 6H), 3.74(s, 3H).

FT-IR (KBr, pellet, cm<sup>-1</sup>): 3369, 3257, 2944, 2840, 1681, 1650, 1595, 1502, 1465, 1425, 1441, 1330, 1276, 1237, 1173, 1130, 995, 852, 745, 675.

Elemental analysis: calculated for C<sub>23</sub>H<sub>22</sub>N<sub>4</sub>O<sub>6</sub> (%): C, 61.33; H, 4.92; N, 12.44. Found: C, 61.17; H, 5.15; N, 12.20.

Melting point of BNB-t1 powder: 233 °C.

*N-(3,4,5-triethoxyphenyl)-N'-4-[(4-hydroxyphenyl)azophenyl] benzohydrazide (BNB-t2)*

<sup>1</sup>H NMR (400MHz, DMSO-*d*<sub>6</sub>), (ppm, from TMS): 10.62 (s, 1H), 10.46 (s, 1H), 10.43 (s, 1H) 8.14-8.05 (d, 2H, *J*=8.4 Hz), 7.96-7.89 (d, 2H, *J*=8.4 Hz), 7.89-7.81 (d, 2H, *J*=8.8 Hz), 7.25 (s, 2H), 7.02-7.93 (d, 2H, *J*=8.8 Hz), 4.18-3.95 (m, 6H), 1.44-1.17 (m, 9H).

FT-IR (KBr, pellet, cm<sup>-1</sup>): 3330, 3262, 2981, 2935, 2894, 1682, 1642, 1585, 1500, 1466, 1436, 1391, 1330, 1271, 1230, 1130, 1026, 897, 852, 756, 689.

Elemental analysis: calculated for C<sub>26</sub>H<sub>28</sub>N<sub>4</sub>O<sub>6</sub> (%): C, 63.40; H, 5.73; N, 11.38. Found: C, 63.52; H, 5.61; N, 11.54.

Melting point of BNB-t2 powder: 223 °C.

*Synthesis of N-(3,4,5-tributoxyphenyl)-N'-4-[(4-methoxyphenyl)azophenyl] benzohydrazide (BNBC-t4)*

4-(4'-methoxyphenyl)azobenzoic acid (1.92 g, 0.0075 mol) [3] and thionyl chloride (50 mL) were refluxed for 10 h. 4-(4'-methoxyphenyl)azobenzoic acid chloride was collected after

removing unreacted thionyl chloride. 4-(4'-methoxyphenyl)azobenzoic acid chloride was dissolved in tetrahydrofuran, 3,4,5-tributoxy-benzoyl hydrazine [4] was added slowly, and the resulting mixture was stirred for 8 h. The resulted reaction mixture was poured into an excess of ice water, and the precipitate was recrystallized from methanol.

*N*-(3,4,5-tributoxyphenyl)-*N'*-4-[(4-methoxyphenyl)azophenyl] benzohydrazide (BNBC-t4)

<sup>1</sup>H NMR (400MHz, DMSO-*d*<sub>6</sub>), (ppm, from TMS): 10.64 (s, 1H), 10.46 (s, 1H), 8.17-8.08 (d, 2H, *J*=8.4 Hz), 8.00-7.91 (d, 4H, *J*=8.8 Hz), 7.25 (s, 2H), 7.20-7.15 (d, 2H, *J*=9.2 Hz), 4.10-3.85 (m, 9H), 1.80-1.58 (m, 6H), 1.55-1.40 (m, 6H), 1.00-0.84 (m, 9H).

FT-IR (KBr, pellet, cm<sup>-1</sup>): 3201, 2955, 2870, 1632, 1595, 1576, 1502, 1458, 1387, 1334, 1298, 1248, 1120, 1031, 895, 850, 751, 677.

Elemental analysis: calculated for C<sub>33</sub>H<sub>42</sub>N<sub>4</sub>O<sub>6</sub> (%): C, 67.10; H, 7.17; N, 9.48. Found: C, 67.28; H, 7.02; N, 9.54.

Melting point of BNBC-t4 powder: 174 °C.

#### References

1. L. Shi, X. Ran, Y. Li, Q. Li, W. Qiu, L. Guo, RSC Adv., 2015, **5**, 38283.
2. X. Ran, H. Wang, P. Zhang, B. Bai, C. Zhao, Z. Yu and M. Li, Soft Matter, 2011, **7**, 8561.
3. Liu, J.; Chiu, Y. J. Polym. Sci. Part A Polym. Chem. 2010, 48, 1142–1148.
4. Y. D. Zhang, K. G. Jespersen, M. Kempe, J. A. Kornfield, S. Barlow, B. Kippelen, S. R. Marder, Langmuir, 2003, **19**, 6534.

#### **Supporting Video:**

Video S1: BNB-t4 gel instantly repaired itself after destructed by vigorous stirring. 1 mL of BNB-t4 gel (16 mg/mL) in 50:50 TCM/CYH was prepared in a vial via the heating-cooling method. Then a stirring bar was added into the vial and the gel was stirred vigorously with a rate of 1000 rpm on a magnetic stirring apparatus. After stirring, the gel repaired itself instantly (within 1s).
